# Supplementary material for: Ultrasonic-assisted modification of a novel silkworm-excrement-based porous carbon with various Lewis acid metal ions for the sustained release of the pesticide thiamethoxam
Source: Royal Society of Chemistry journal article supplement (doi:10.1039/c7ra04595f), 2017-01-01
Supplement: c7ra04595f1.pdf [file c7ra04595f1.pdf]

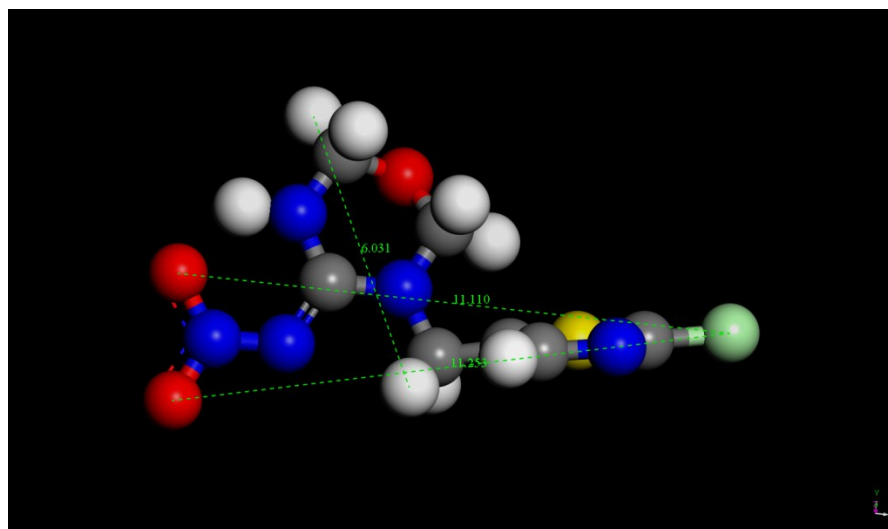

**Fig.S1** Molecular size and 3D structure of TM. The C, H, O, N, S and Cl atoms were shown as black, white, red, blue, yellow and green spheres, respectively.

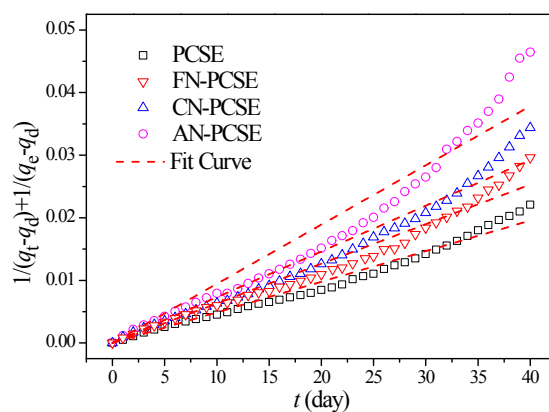

**Fig. S2** Dependence of  $1/(q_t - q_d) + 1/(q_e - q_d)$  of TM controlled-release on time at PCSE and LAMI modified PCSEs

**Table S1** Kinetic constants for TM controlled-release on PCSE and LAMI modified PCSEs

| Materials | $q_d$ (mg/g) | $k_d$ (g/(mg·day)) $\times 10^4$ | $R^2$  |
|-----------|--------------|----------------------------------|--------|
| AN-PCSE   | 185.83       | 9.46                             | 0.9711 |
| CN-PCSE   | 207.23       | 7.31                             | 0.9724 |
| FN-PCSE   | 240.62       | 6.32                             | 0.9521 |
| PCSE      | 293.74       | 4.89                             | 0.9802 |
